# Supplementary material for: Microemulsions: An Encapsulation Strategy to Increase the Thermal Stability of D-limonene
Source: MDPI journal article supplement (doi:10.3390/pharmaceutics15112564), 2023-11-01
Supplement: s1 [file s1]

**Figure S1.** Analytical scanning (190 to 450 nm) of mixture Labrasol : water (70:30).

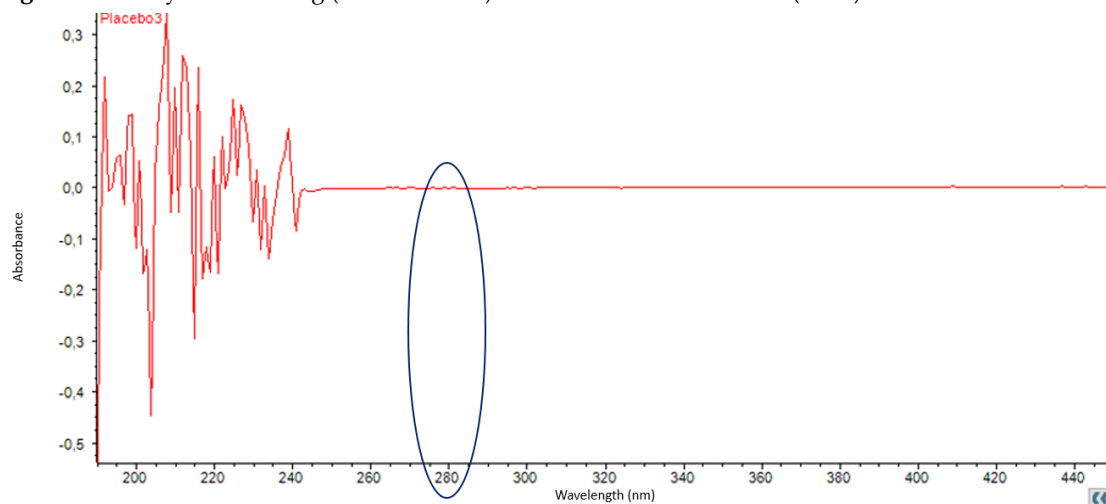

**Figure S2.** Analytical scanning (190 to 450 nm) of absolute ethanol.

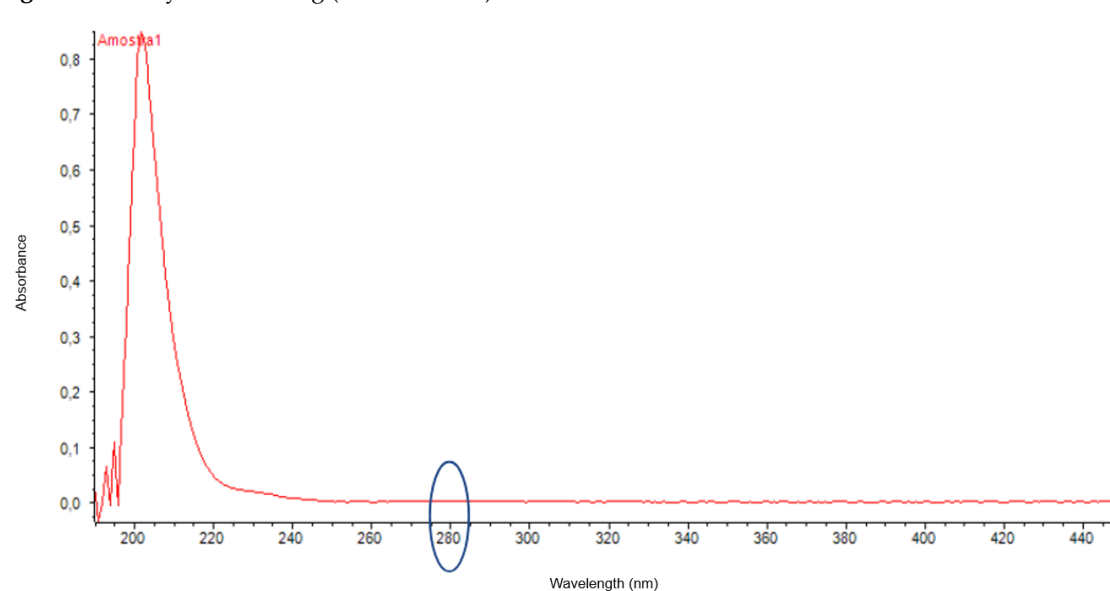

**Figure S3.** Analytical calibration curve of D-limonene concentration as a function of absorbance.

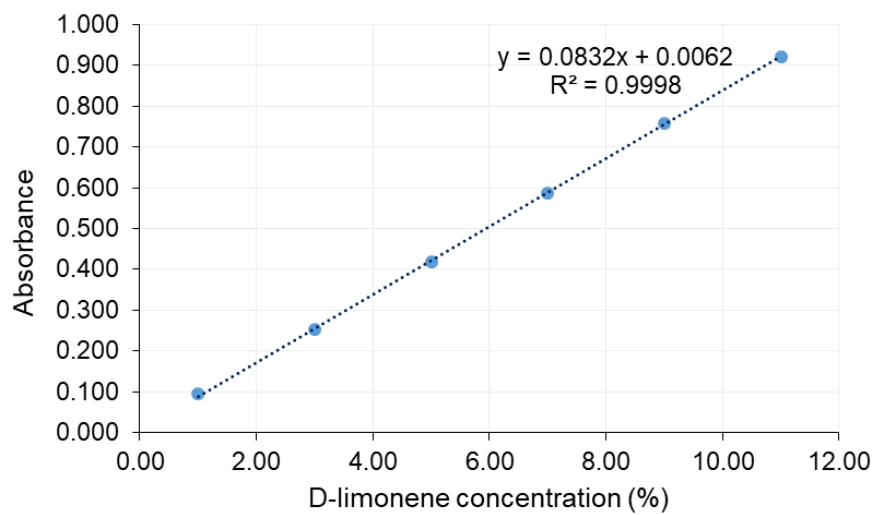

**Figure S4.** Formulations obtained based on a required HLB of 6.4, using the surfactant mixture of 27.27% Labrasol® and 72.73% Span 80.

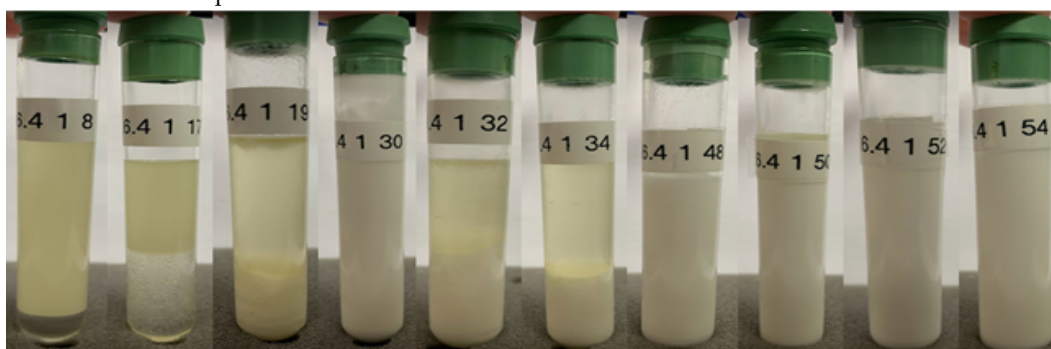

**Figure S5.** Formulations obtained based on a required HLB of 6.4, using the surfactant mixture of 45.1% Labrasol® + 54.9% Span 85.

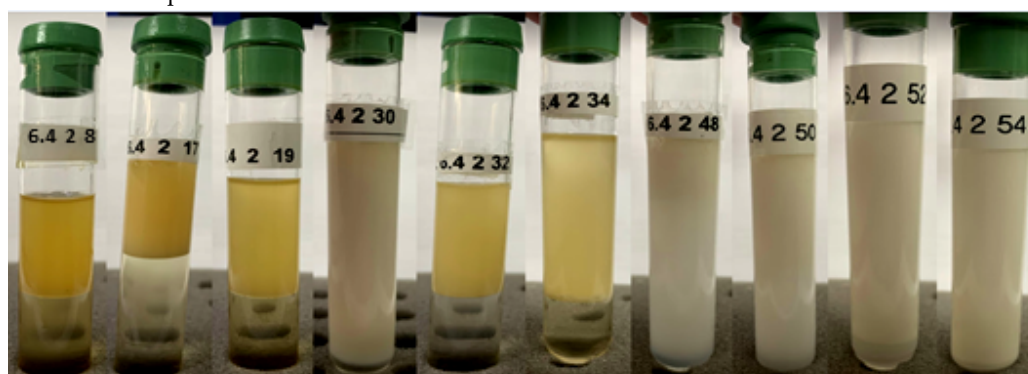

**Figure S6.** Formulations obtained based on a required HLB of 6.4, using the surfactant mixture of 19.81% Tween 60 + 80.19% Span 80.

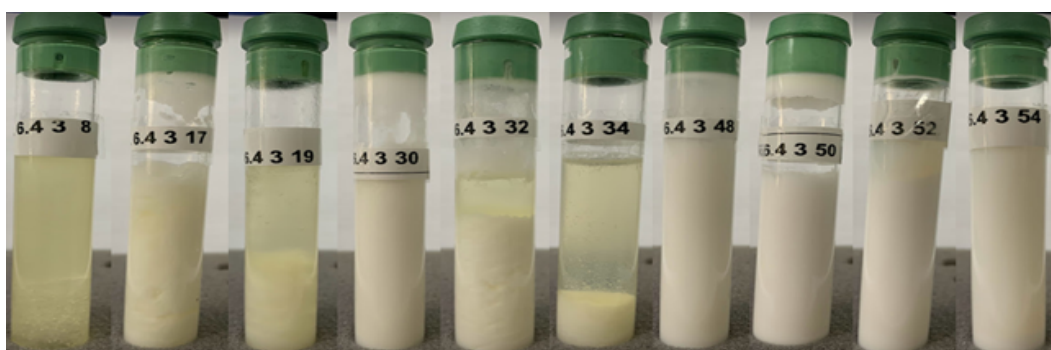

**Figure S7.** Formulations obtained based on a required HLB of 6.4, using the surfactant mixture of 35.11% Tween 60 and 64.89% Span 85.

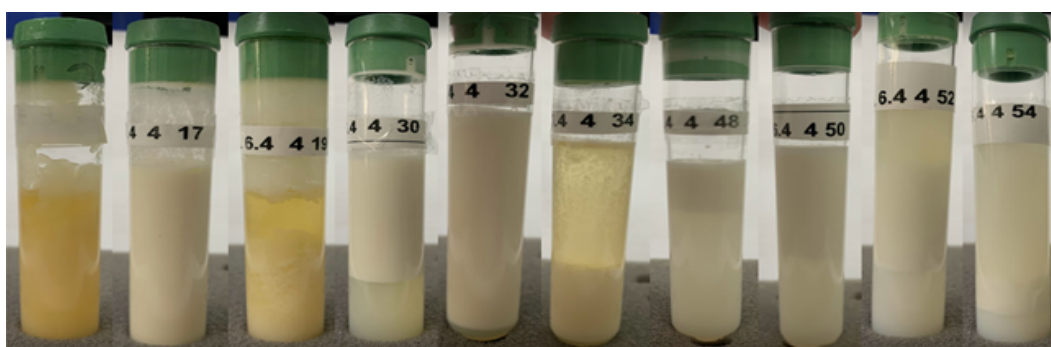

**Figure S8.** Formulations obtained based on a required HLB of 8.7, using a surfactant mixture of 37.74% Labrasol® and 62.26% Span 40.

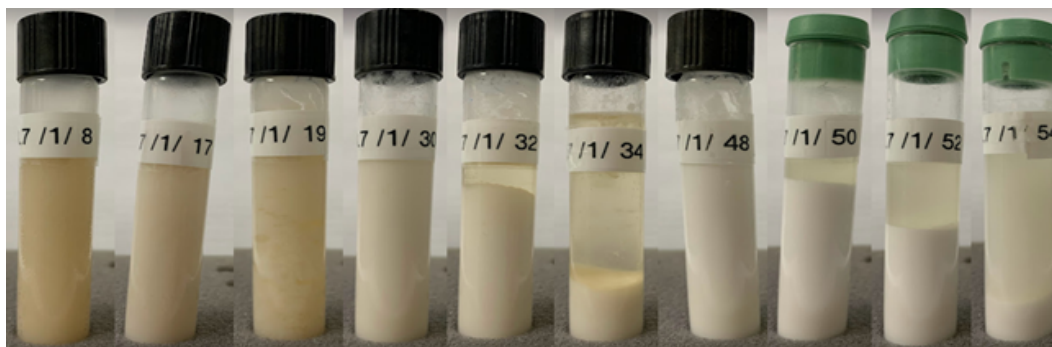

**Figure S9.** Formulations obtained based on a required HLB of 8.7, using a surfactant mixture of 57.14% Labrasol® and 42.86% Span 80.

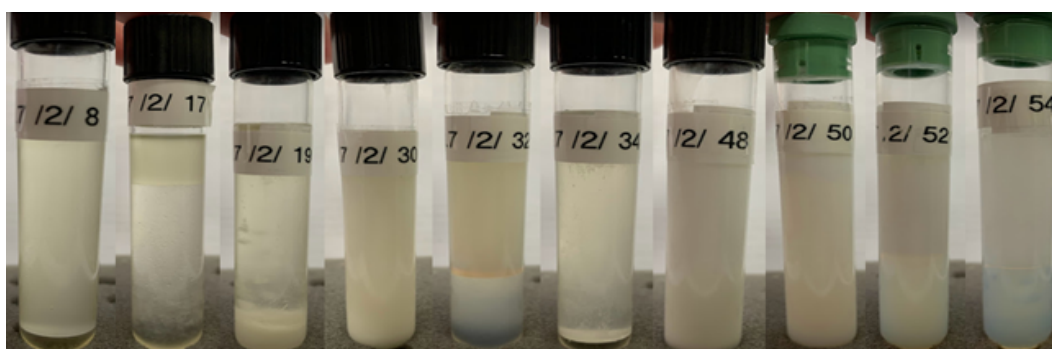

**Figure S10.** Formulations obtained based on a required HLB of 8.7, using a surfactant mixture of 24.39% Tween 60 and 75.61% Span 40.

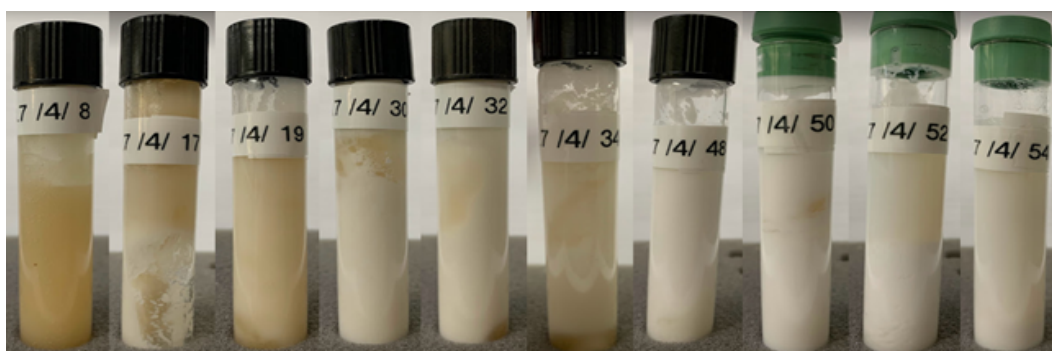

**Figure S11.** Formulations obtained based on a HLB required equal to 8.7, using a surfactant mixture of 41.51% Tween 60 + 58.49% Span 80.

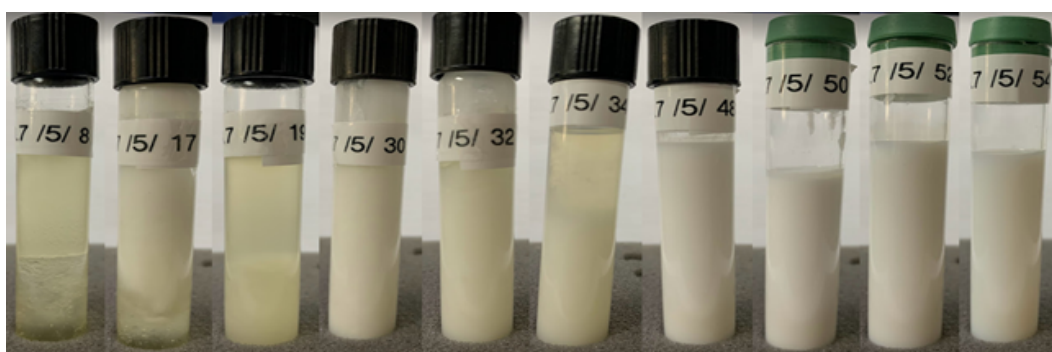

**Figure S12.** Formulations obtained based on a required HLB of 8.7, using a surfactant mixture of 52.67% Tween 60 and 47.33% Span 85.

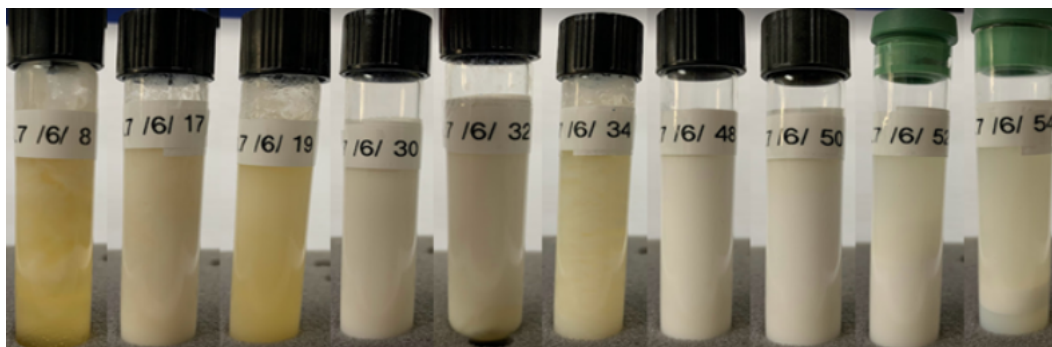

**Figure S13.** Formulations obtained using the surfactant mixture for an HLB requirement of 12, with reference to 72.64% Tween 60 + 27.36% Span 80.

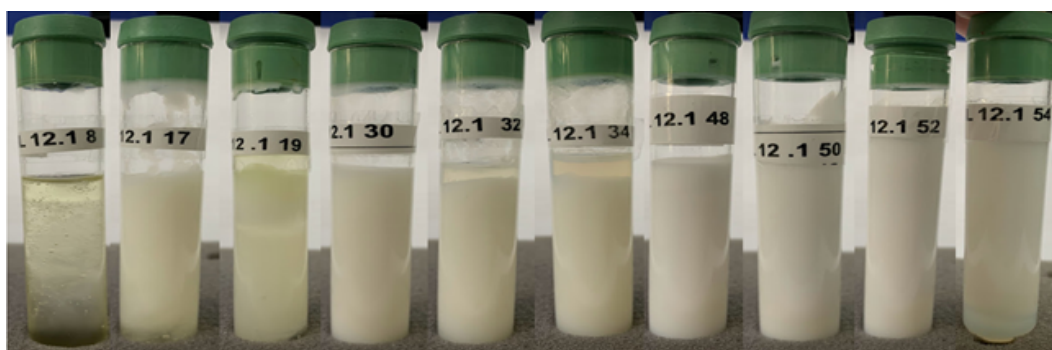

**Figure S14.** Formulations obtained based on a HLB requirement of 12, using a surfactant mixture of 77.86% Tween 60 and 22.14% Span 85.

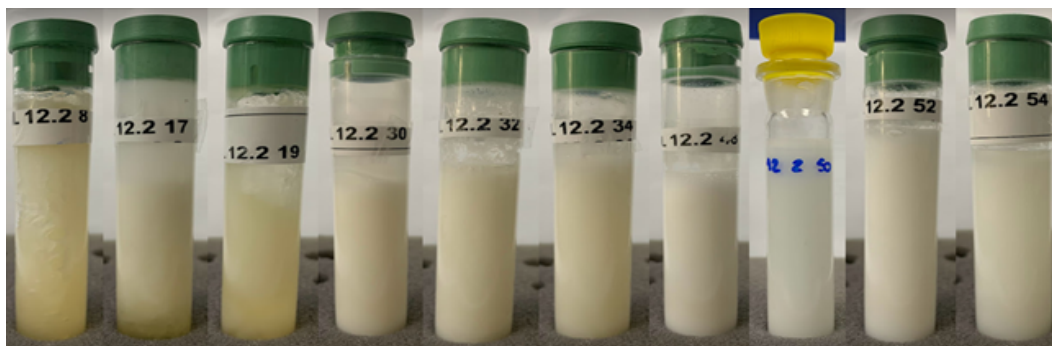



**Figure S15.** Formulation Obtained via Titration A, derived from a mixture of 55% D-limonene and 45% Labrasol.

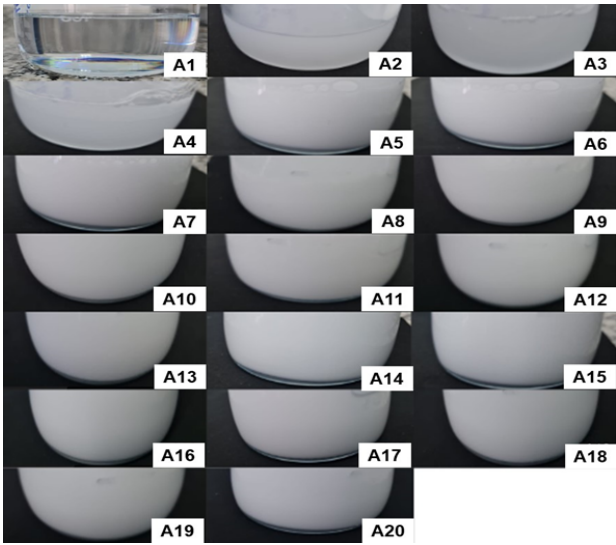

**Figure S16.** Resulting formulation from titration B, derived from a mixture of 40% D-limonene and 60% Labrasol.

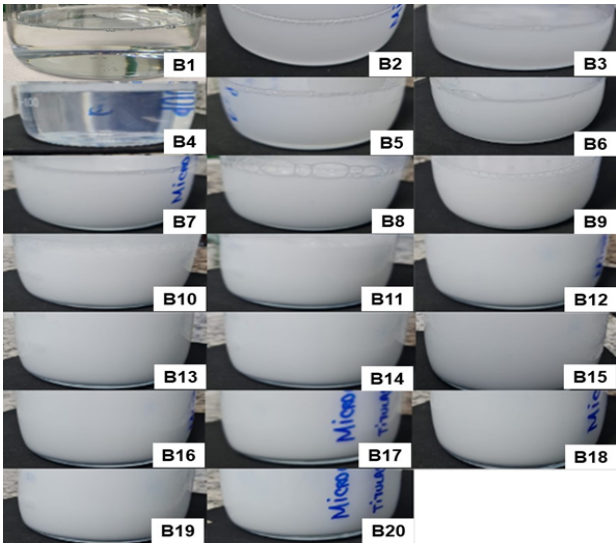

**Figure S17.** Resulting formulation from titration C, derived from a mixture of 30% D-limonene and 70% Labrasol.

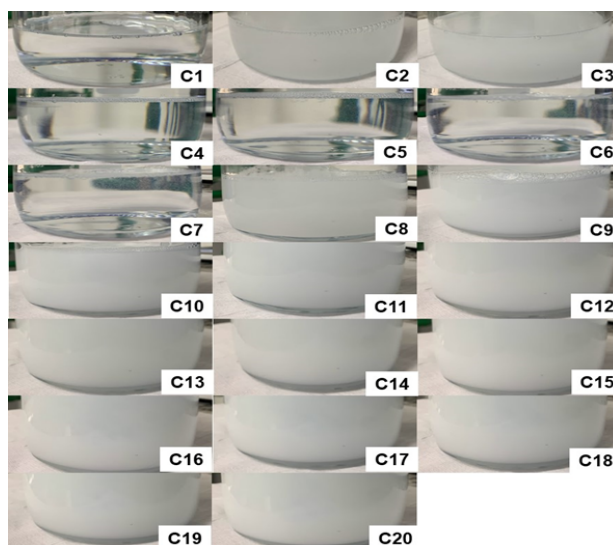

**Figure S18.** Resulting formulation from titration D, derived from a mixture of 20% D-limonene and 80% Labrasol.

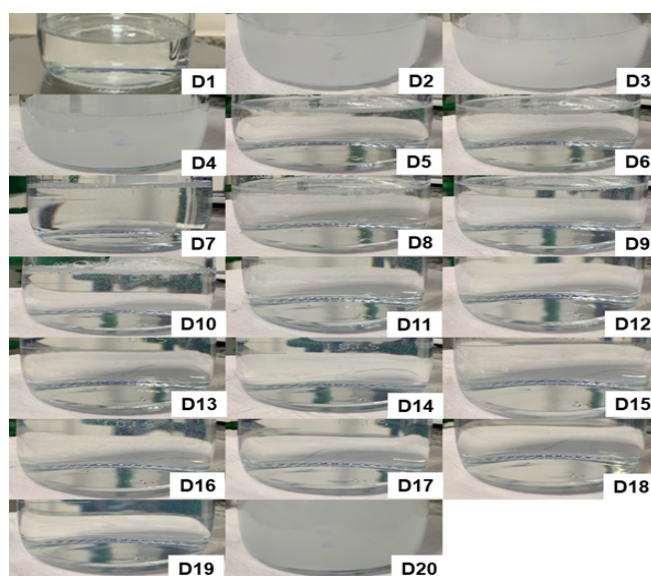

**Table S1.** Theoretical concentration of D-limonene, practical concentration of D-limonene, mean, standard deviation (n=3), and average content of D-limonene.

| <b>Formulation</b> | <b>Theoretical<br/>concentration of<br/>d-limonene (%)</b> | <b>Mean<br/>Concentration<br/>(%)</b> | <b>Standard<br/>deviation</b> | <b>Average content<br/>(%)</b> |
|--------------------|------------------------------------------------------------|---------------------------------------|-------------------------------|--------------------------------|
| B4                 | 30.800                                                     | 31.000                                | 0.292                         | 100.649                        |
| C4                 | 23.100                                                     | 23.244                                | 0.028                         | 100.622                        |
| C5                 | 21.400                                                     | 21.304                                | 0.028                         | 99.554                         |
| C6                 | 20.000                                                     | 21.000                                | 0.000                         | 105.000                        |
| C7                 | 18.800                                                     | 18.917                                | 0.056                         | 100.621                        |
| D5                 | 14.300                                                     | 14.301                                | 0.121                         | 100.009                        |
| D6                 | 13.300                                                     | 13.660                                | 0.073                         | 102.709                        |
| D7                 | 12.500                                                     | 12.747                                | 0.121                         | 101.974                        |
| D8                 | 11.800                                                     | 11.897                                | 0.028                         | 100.826                        |
| D9                 | 11.100                                                     | 11.272                                | 0.073                         | 101.553                        |
| D10                | 10.500                                                     | 10.923                                | 0.036                         | 104.029                        |
| D11                | 10.000                                                     | 10.430                                | 0.024                         | 104.303                        |
| D12                | 9.500                                                      | 10.046                                | 0.024                         | 105.744                        |
| D13                | 9.100                                                      | 9.625                                 | 0.087                         | 105.769                        |
| D14                | 8.700                                                      | 9.104                                 | 0.060                         | 104.646                        |
| D15                | 8.300                                                      | 8.535                                 | 0.069                         | 102.834                        |
| D16                | 8.000                                                      | 8.267                                 | 0.062                         | 103.355                        |
| D17                | 7.700                                                      | 7.742                                 | 0.046                         | 100.545                        |
| D18                | 7.400                                                      | 7.429                                 | 0.037                         | 100.398                        |
| D19                | 7.100                                                      | 7.173                                 | 0.024                         | 101.029                        |
| F17                | 10.000                                                     | 10.647                                | 0.028                         | 106.474                        |
| F19                | 30.000                                                     | 31.417                                | 0.309                         | 104.722                        |

**Table S2.** Results of the oxidative stability of D-limonene based on maximum pressure, final pressure, and induction period.

| <b>Sample</b> | <b>Maximum pressure (kPa)</b> | <b>Final pressure (kPa)</b> | <b>Induction period (min)</b> |
|---------------|-------------------------------|-----------------------------|-------------------------------|
| D-limonene    | 513.50                        | 461.70                      | 4.88                          |
| B4            | 688.60                        | 619.00                      | 19.18                         |
| B4 placebo    | 695.60                        | 625.90                      | 61.28                         |
| C4            | 703.60                        | 632.90                      | 22.67                         |
| C4 placebo    | 694.60                        | 624.90                      | 36.83                         |
| C5            | 703.60                        | 632.90                      | 22.18                         |
| C5 placebo    | 703.60                        | 632.90                      | 41.17                         |
| C6            | 697.60                        | 626.90                      | 22.83                         |
| C6 placebo    | 666.70                        | 600.10                      | 47.57                         |
| C7            | 697.60                        | 626.90                      | 22.57                         |
| C7 placebo    | 701.60                        | 630.90                      | 49.93                         |
| D5            | 698.60                        | 627.90                      | 29.48                         |
| D5 placebo    | 694.60                        | 624.90                      | 36.02                         |
| D6            | 697.60                        | 626.90                      | 29.55                         |
| D6 placebo    | 696.60                        | 626.90                      | 46.10                         |
| D7            | 700.60                        | 629.90                      | 34.17                         |
| D7 placebo    | 705.60                        | 634.90                      | 57.37                         |
| D8            | 705.60                        | 634.90                      | 36.58                         |
| D8 placebo    | 704.60                        | 633.90                      | 74.53                         |
| D9            | 687.60                        | 618.00                      | 37.65                         |
| D9 placebo    | 709.50                        | 637.90                      | 58.17                         |
| D10           | 684.70                        | 616.00                      | 39.30                         |
| D10 placebo   | 703.60                        | 632.90                      | 80.98                         |
| D11           | 696.60                        | 626.90                      | 40.33                         |
| D11 placebo   | 704.60                        | 633.90                      | 67.88                         |
| F17           | 656.80                        | 591.10                      | 19.43                         |
| F17 placebo   | 636.70                        | 572.00                      | 63.02                         |
| F19           | 673.70                        | 606.00                      | 29.83                         |
| F19 placebo   | 632.70                        | 569.10                      | 66.67                         |
